# Supplementary material
Source: MDPI journal article supplement (https://www.mdpi.com/2076-3417/13/16/9346)
Supplement: s1 [file s1]

## Supplementary table legends:

**Supplementary Table S1.** Comparison of independent testing results between IL10-Stack and other existing methods.

|                | Sampling method     | Machine learning algorithm | Cross validation    |                     |                     |                     |                     |                     | Independent test    |                     |                     |                                  |                     |                     |
|----------------|---------------------|----------------------------|---------------------|---------------------|---------------------|---------------------|---------------------|---------------------|---------------------|---------------------|---------------------|----------------------------------|---------------------|---------------------|
|                |                     |                            | ACC                 | MCC                 | Sn                  | Sp                  | AUC                 | P                   | ACC                 | MCC                 | Sn                  | Sp                               | AUC                 | P                   |
| Under-sampling | RUS <sup>b</sup>    | SVM                        | 0.879               | 0.758               | 0.842               | 0.913               | 0.944               | 0.901               | 0.919               | 0.838               | 0.907               | <b><u>0.931</u></b> <sup>a</sup> | 0.966               | 0.933               |
|                | RUS                 | LGBM                       | 0.872               | 0.744               | 0.865               | 0.879               | 0.933               | 0.870               | 0.904               | 0.809               | 0.921               | 0.886                            | 0.950               | 0.896               |
|                | RUS                 | Stack                      | 0.881               | 0.765               | 0.895               | 0.868               | 0.913               | 0.867               | 0.911               | 0.823               | 0.935               | 0.886                            | 0.938               | 0.898               |
|                | CC <sup>b</sup>     | SVM                        | 0.711               | 0.421               | 0.692               | 0.728               | 0.797               | 0.709               | 0.685               | 0.392               | 0.581               | 0.804                            | 0.788               | 0.772               |
|                | CC                  | LGBM                       | 0.785               | 0.570               | 0.758               | 0.811               | 0.842               | 0.793               | 0.761               | 0.523               | 0.752               | 0.772                            | 0.840               | 0.790               |
|                | CC                  | Stack                      | 0.785               | 0.575               | 0.768               | 0.801               | 0.788               | 0.790               | 0.751               | 0.503               | 0.743               | 0.761                            | 0.755               | 0.780               |
|                | NM <sup>b</sup>     | SVM                        | 0.788               | 0.577               | 0.772               | 0.805               | 0.845               | 0.791               | 0.751               | 0.503               | 0.743               | 0.761                            | 0.808               | 0.780               |
|                | NM                  | LGBM                       | 0.765               | 0.530               | 0.723               | 0.805               | 0.857               | 0.780               | 0.726               | 0.457               | 0.686               | 0.772                            | 0.795               | 0.774               |
|                | NM                  | Stack                      | 0.788               | 0.579               | 0.737               | 0.838               | 0.789               | 0.812               | 0.726               | 0.457               | 0.686               | 0.772                            | 0.725               | 0.774               |
| Over-sampling  | ROS <sup>b</sup>    | SVM                        | 0.867               | 0.737               | 0.821               | 0.912               | 0.938               | 0.900               | 0.903               | 0.806               | 0.902               | 0.905                            | <b><u>0.968</u></b> | 0.914               |
|                | ROS                 | LGBM                       | 0.869               | 0.739               | 0.851               | 0.887               | 0.940               | 0.879               | 0.920               | 0.839               | 0.933               | 0.905                            | 0.966               | 0.917               |
|                | ROS                 | Stack                      | 0.877               | 0.756               | 0.856               | 0.898               | 0.908               | 0.891               | 0.920               | 0.839               | 0.937               | 0.900                            | 0.956               | 0.913               |
|                | ADASYN <sup>b</sup> | SVM                        | 0.888               | 0.776               | 0.866               | 0.909               | 0.949               | 0.899               | <b><u>0.921</u></b> | <b><u>0.842</u></b> | 0.912               | <b><u>0.931</u></b>              | 0.964               | <b><u>0.934</u></b> |
|                | ADASYN              | LGBM                       | 0.860               | 0.720               | 0.845               | 0.875               | 0.924               | 0.863               | 0.890               | 0.780               | 0.903               | 0.876                            | 0.938               | 0.886               |
|                | ADASYN              | Stack                      | 0.882               | 0.764               | 0.873               | 0.890               | 0.906               | 0.883               | 0.916               | 0.833               | <b><u>0.940</u></b> | 0.891                            | 0.939               | 0.902               |
|                | SMOTE <sup>b</sup>  | SVM                        | 0.881               | 0.762               | 0.845               | <b><u>0.915</u></b> | <b><u>0.951</u></b> | <b><u>0.905</u></b> | 0.892               | 0.784               | 0.871               | 0.915                            | 0.952               | 0.920               |
|                | SMOTE               | LGBM                       | 0.866               | 0.732               | 0.837               | 0.894               | 0.922               | 0.883               | 0.884               | 0.769               | 0.875               | 0.895                            | 0.948               | 0.903               |
|                | SMOTE               | Stack                      | <b><u>0.897</u></b> | <b><u>0.796</u></b> | <b><u>0.918</u></b> | 0.877               | 0.913               | 0.878               | 0.910               | 0.820               | 0.933               | 0.885                            | 0.920               | 0.901               |

<sup>a</sup> The best performance values are indicated in bold and underlined.

<sup>b</sup> RUS: random under-sampling; CC: cluster centroids; NM: near miss; ROS: random over-sampling; ADASYN: adaptive synthetic; SMOTE: synthetic minority over-sampling technique.

We tried six different methods, including SMOTE, to balance the data for various models. Our approaches mainly fall into two categories: oversampling and under-sampling. Oversampling involves increasing the instances of the minority class, while under-sampling involves decreasing the instances of the majority class. Below, we provide these different methods' names and principles.

#### i) Under-sampling

- Random Under-Sampling (RUS)

Principle: Randomly select and remove majority class samples.

- Cluster Centroids (CC)

Principle: By clustering the majority class samples and then selecting the cluster centers as new minority class samples, data balance is achieved.

- Near Miss (NM)

Principle: Attempt to retain the majority class samples that are closest to the minority class samples to better capture the characteristics of the minority class.

#### ii) Over-sampling

- Random Over-Sampling (ROS)

Principle: Randomly duplicate the minority class samples to generate new samples, thus increasing their quantity to match that of the majority class.

- Adaptive Synthetic (ADASYN)

Principle: The number of generated samples is determined based on the ratio of majority class samples in the neighboring samples, reducing data imbalance.

- Synthetic Minority Oversampling Technique (SMOTE)

Principle: Generate minority samples through random linear interpolation between minority sample points and their neighboring points.
